# Supplementary material
Source: PubMed Central journal article supplement (PMC2751807)
Supplement: NIHMS63007-supplement-1File004.pdf [file NIHMS63007-supplement-1File004.pdf]

S1.

Scanning electron microscope images of Nafion patterned glasses (b) before and (c) after PDMS bonding step. The thickness of the Nafion membrane on glass was 191 nm.

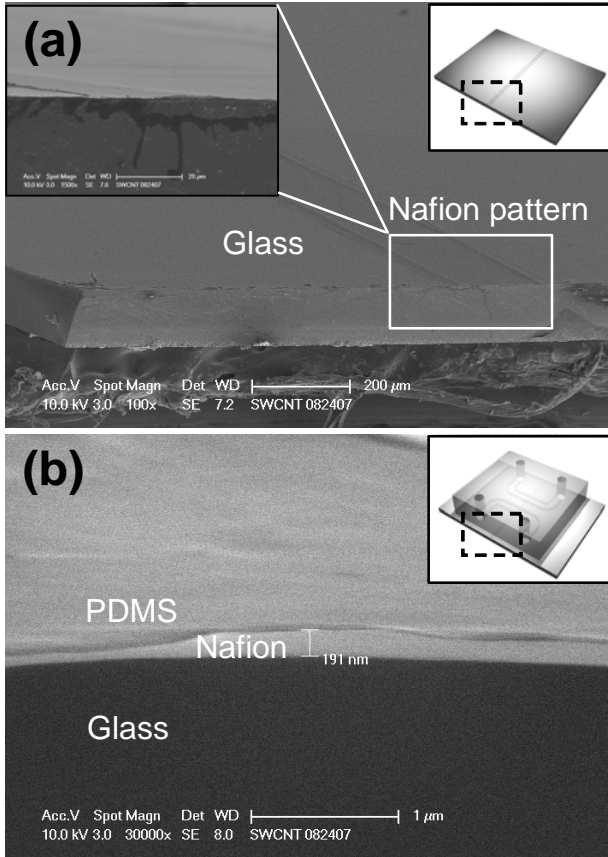

S2.

The fitting curves in Figures 3 have the following equation:  $f = \frac{ax}{b+x}$  (hyperbola, 2 parameters). Its first derivate form is:  $f' = \frac{ab}{(b+x)^2}$

Table 1. Coefficients for the fitting and slope curves without preconcentration

| $C_{\text{trypsin}}$ | a                | b             |
|----------------------|------------------|---------------|
| 1 ng/mL              | 94.4034±20.1388  | 0.6925±2.8606 |
| 10 ng/mL             | 155.7665±23.9335 | 1.4028±2.3908 |
| 100 ng/mL            | 168.6246±20.2717 | 0.9230±1.6964 |
| 1 µg/mL              | 221.6825±22.6362 | 1.5820±1.6436 |

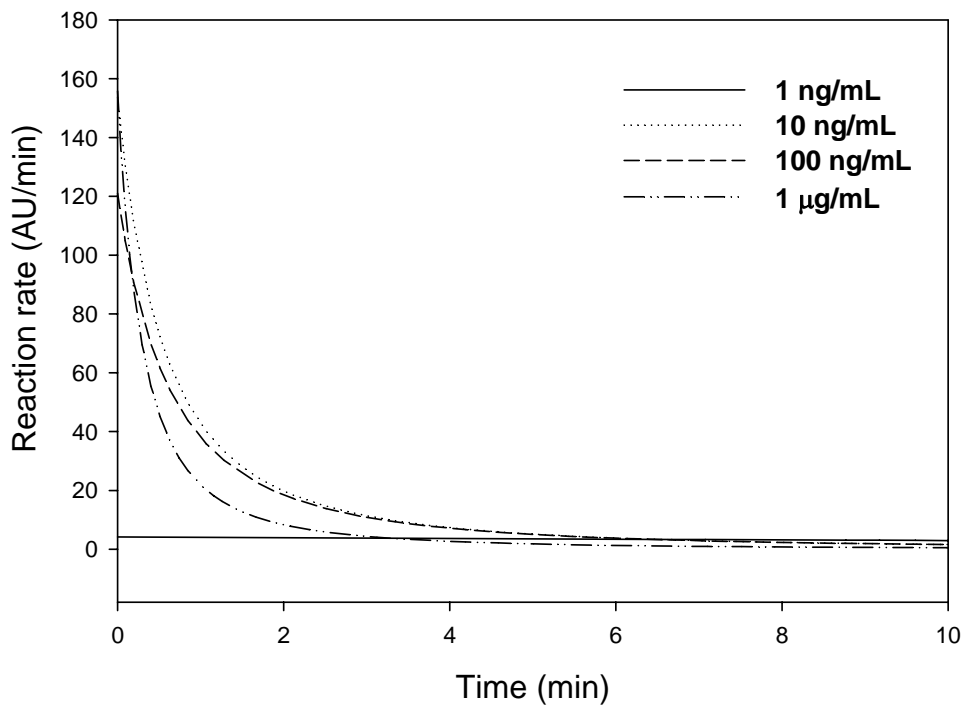

S3.

The fitting curves in Figures 4 have the following equation:  $f = \frac{ax}{b+x}$  (hyperbola, 2 parameters). Its first derivate form is:  $f' = \frac{ab}{(b+x)^2}$

Table 2. Coefficients for the fitting and slope curves with preconcentration

| $C_{\text{trypsin}}$ | a                   | b               |
|----------------------|---------------------|-----------------|
| 10 pg/mL             | 5720.3163±1130.3878 | 50.1613±13.9960 |
| 100 pg/mL            | 3346.4409±230.0915  | 9.3673±1.5716   |
| 1 ng/mL              | 3833.5571±79.3815   | 1.1567±0.1333   |
